# Supplementary material
Source: HighWire-hosted journal article supplement (https://diabetes.diabetesjournals.org/content/suppl/2007/11/26/db07-0381)

# Supplemental Figure 3

## H4IIE

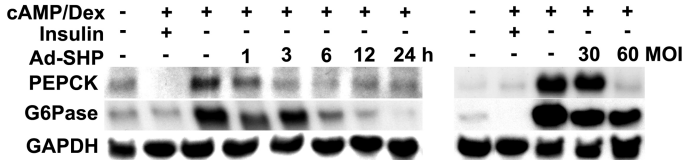

Supplement: db070381SupplFigure3.pdf [file db070381SupplFigure3.pdf]

# Supplemental Figure 4

*ob/ob* mice

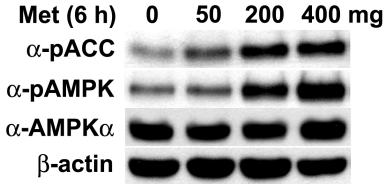

Supplement: db070381SupplFigure4.pdf [file db070381SupplFigure4.pdf]
